# Supplementary material
Source: ML conference proceedings conference paper supplement (https://openaccess.thecvf.com/content/WACV2024/html/Yenamandra_FIRe_Fast_Inverse_WACV_2024_paper.html)
Supplement: Supplementary file 3 [file Yenamandra_FIRe_Fast_Inverse_WACV_2024_supplemental.zip]

Archive with 4 entries (4 files):
- 0094_video.mov
- __MACOSX/._0094_video.mov
- 0094_supp.pdf
- __MACOSX/._0094_supp.pdf
